# Supplementary material for: Treatment Patterns and healthcare costs of Migraine Patients in China: Insights from a Retrospective Database Study
Source: Research Square preprint supplement (doi:10.21203/rs.3.rs-7149897/v1), 2025-08-06
Supplement: Supplementary file 1 [file 2bd9a6dbf6c7ba12e495eb62.xlsx]

## Sheet: Sheet1
Acute treatment	Preventive treatment	Traditional Chinese Medicine	First prescription (N = 168,421)		Second prescription (N = 39909)		Third prescription (N = 16802)		Fourth prescription (N = 9393)		Fifth prescription (N = 5983)		Sixth prescription (N = 4192)		Seventh prescription (N = 3108)		Eighth prescription (N = 2405)		Ninth prescription (N = 1904)		Tenth prescription (N = 1525)
None	None	None	48290	0.286722	11452	0.286953	4422	0.263183	2324	0.247418	1465	0.24486	1019	0.243082	757	0.243565	630	0.261954	463	0.243172	363	0.238033
None	None	chinese_herbal	10440	0.0619875	3856	0.0966198	2022	0.120343	1292	0.137549	896	0.149758	638	0.152195	475	0.152831	378	0.157173	296	0.155462	256	0.167869
None	None	chinese_calmingmind	216	0.0012825	80	0.00200456	33	0.00196405	13	0.00138401	10	0.0016714	5	0.00119275	3	0.000965251	4	0.0016632	3	0.00157563	2	0.00131148
None	None	chinese_calmingmind, chinese_herbal	50	0.000296875	10	0.00025057	12	0.000714201	9	0.00095816	4	0.000668561	3	0.000715649	2	0.000643501	2	0.000831601	2	0.00105042	1	0.000655738
None	None	chinese_headache	8232	0.0488775	2147	0.0537974	897	0.0533865	494	0.0525924	312	0.0521478	223	0.0531966	163	0.0524453	129	0.0536383	110	0.0577731	81	0.0531148
None	None	chinese_headache, chinese_herbal	3857	0.0229009	1031	0.0258338	419	0.0249375	209	0.0222506	115	0.0192211	97	0.0231393	70	0.0225225	42	0.0174636	35	0.0183824	32	0.0209836
None	None	chinese_headache, chinese_calmingmind	18	0.000106875	10	0.00025057	1	5.95167e-05	3	0.000319387	1	0.00016714	2	0.000477099	1	0.00032175		0		0		0
None	None	chinese_headache, chinese_calmingmind, chinese_herbal	23	0.000136563	5	0.000125285	2	0.000119033		0		0		0	2	0.000643501	2	0.000831601	1	0.00052521	1	0.000655738
None	None	chinese_acupuncture	2775	0.0164766	1509	0.037811	921	0.0548149	646	0.0687746	465	0.0777202	355	0.0846851	281	0.0904118	233	0.0968815	188	0.0987395	155	0.101639
None	None	chinese_acupuncture, chinese_herbal	711	0.00422156	349	0.00874489	223	0.0132722	153	0.0162887	109	0.0182183	68	0.0162214	52	0.016731	33	0.0137214	40	0.0210084	39	0.0255738
None	None	chinese_acupuncture, chinese_calmingmind	3	1.78125e-05	1	2.5057e-05		0		0		0		0		0		0		0		0
None	None	chinese_acupuncture, chinese_calmingmind, chinese_herbal	4	2.375e-05	1	2.5057e-05		0		0		0		0	1	0.00032175	1	0.0004158		0		0
None	None	chinese_acupuncture, chinese_headache	87	0.000516563	28	0.000701596	16	0.000952268	10	0.00106462	1	0.00016714	4	0.000954198	1	0.00032175	1	0.0004158		0		0
None	None	chinese_acupuncture, chinese_headache, chinese_herbal	135	0.000801563	58	0.00145331	27	0.00160695	14	0.00149047	10	0.0016714	6	0.0014313	3	0.000965251	3	0.0012474		0	2	0.00131148
None	None	chinese_acupuncture, chinese_headache, chinese_calmingmind	1	5.9375e-06		0		0		0		0		0		0		0		0		0
None	None	chinese_acupuncture, chinese_headache, chinese_calmingmind, chinese_herbal		0	1	2.5057e-05		0		0		0		0		0		0		0		0
None	others_preventive	None	451	0.00267781	131	0.00328247	68	0.00404714	41	0.00436495	24	0.00401137	16	0.00381679	18	0.00579151	14	0.00582121	9	0.00472689	9	0.00590164
None	others_preventive	chinese_herbal	126	0.000748125	37	0.000927109	18	0.0010713	8	0.000851698	6	0.00100284	6	0.0014313	5	0.00160875	1	0.0004158	3	0.00157563	1	0.000655738
None	others_preventive	chinese_calmingmind	2	1.1875e-05		0		0	1	0.000106462		0		0		0		0		0		0
None	others_preventive	chinese_headache	82	0.000486875	16	0.000400912	4	0.000238067	8	0.000851698	2	0.00033428	3	0.000715649	3	0.000965251		0	2	0.00105042	1	0.000655738
None	others_preventive	chinese_headache, chinese_herbal	55	0.000326563	11	0.000275627	6	0.0003571	2	0.000212925	2	0.00033428		0		0		0		0	1	0.000655738
None	others_preventive	chinese_acupuncture	6	3.5625e-05	2	5.0114e-05	2	0.000119033	1	0.000106462		0	1	0.00023855		0		0		0		0
None	others_preventive	chinese_acupuncture, chinese_herbal	7	4.15625e-05	1	2.5057e-05	1	5.95167e-05		0		0	1	0.00023855	1	0.00032175		0		0		0
None	others_preventive	chinese_acupuncture, chinese_headache		0	1	2.5057e-05		0		0		0		0		0		0		0		0
None	others_preventive	chinese_acupuncture, chinese_headache, chinese_herbal	1	5.9375e-06	1	2.5057e-05		0		0		0		0		0		0	1	0.00052521		0
None	antidepressants	None	139	0.000825313	71	0.00177905	49	0.00291632	31	0.00330033	30	0.00501421	18	0.00429389	19	0.00611326	9	0.0037422	8	0.00420168	6	0.00393443
None	antidepressants	chinese_herbal	7	4.15625e-05	6	0.000150342	1	5.95167e-05	3	0.000319387		0	1	0.00023855	1	0.00032175	2	0.000831601	2	0.00105042		0
None	antidepressants	chinese_headache	22	0.000130625	10	0.00025057	7	0.000416617	4	0.000425849	3	0.000501421	3	0.000715649	2	0.000643501	1	0.0004158	1	0.00052521	1	0.000655738
None	antidepressants	chinese_headache, chinese_herbal	1	5.9375e-06		0		0		0		0		0		0		0		0		0
None	antidepressants	chinese_headache, chinese_calmingmind	1	5.9375e-06		0		0		0		0	1	0.00023855		0		0		0		0
None	antidepressants	chinese_acupuncture, chinese_herbal		0		0		0	1	0.000106462	1	0.00016714		0		0		0		0		0
None	antidepressants, others_preventive	None	1	5.9375e-06	1	2.5057e-05		0		0		0	1	0.00023855		0		0		0		0
None	antiepileptics	None	1496	0.0088825	536	0.0134306	287	0.0170813	192	0.0204408	122	0.0203911	86	0.0205153	75	0.0241313	52	0.0216216	44	0.0231092	33	0.0216393
None	antiepileptics	chinese_herbal	147	0.000872813	44	0.00110251	10	0.000595167	5	0.000532311	3	0.000501421	5	0.00119275	4	0.001287	2	0.000831601	2	0.00105042	1	0.000655738
None	antiepileptics	chinese_calmingmind	6	3.5625e-05	3	7.5171e-05		0	2	0.000212925		0		0	1	0.00032175		0		0	1	0.000655738
None	antiepileptics	chinese_calmingmind, chinese_herbal		0		0	1	5.95167e-05		0		0		0		0		0		0		0
None	antiepileptics	chinese_headache	338	0.00200688	116	0.00290661	58	0.00345197	38	0.00404557	25	0.00417851	17	0.00405534	13	0.00418275	8	0.0033264	12	0.00630252	10	0.00655738
None	antiepileptics	chinese_headache, chinese_herbal	51	0.000302813	19	0.000476083	12	0.000714201	3	0.000319387	8	0.00133712	1	0.00023855	1	0.00032175		0		0	1	0.000655738
None	antiepileptics	chinese_acupuncture	3	1.78125e-05		0	1	5.95167e-05		0		0		0		0		0		0		0
None	antiepileptics	chinese_acupuncture, chinese_herbal	4	2.375e-05		0		0		0		0		0		0	1	0.0004158		0		0
None	antiepileptics	chinese_acupuncture, chinese_headache, chinese_herbal		0		0		0	1	0.000106462		0		0		0		0		0		0
None	antiepileptics, others_preventive	None	10	5.9375e-05	4	0.000100228	2	0.000119033		0	2	0.00033428	1	0.00023855	1	0.00032175	1	0.0004158		0		0
None	antiepileptics, others_preventive	chinese_herbal	3	1.78125e-05	2	5.0114e-05		0	1	0.000106462	1	0.00016714		0		0		0		0		0
None	antiepileptics, others_preventive	chinese_headache	1	5.9375e-06	1	2.5057e-05		0		0	1	0.00016714		0		0	1	0.0004158		0		0
None	antiepileptics, others_preventive	chinese_acupuncture, chinese_herbal		0	1	2.5057e-05		0		0		0		0		0		0		0		0
None	antiepileptics, antidepressants	None	53	0.000314688	29	0.000726653	27	0.00160695	21	0.00223571	11	0.00183854	4	0.000954198	6	0.0019305	3	0.0012474	3	0.00157563	4	0.00262295
None	antiepileptics, antidepressants	chinese_herbal	2	1.1875e-05	3	7.5171e-05	2	0.000119033	1	0.000106462	2	0.00033428		0	1	0.00032175	2	0.000831601	2	0.00105042		0
None	antiepileptics, antidepressants	chinese_headache	2	1.1875e-05	2	5.0114e-05	1	5.95167e-05	2	0.000212925		0		0		0		0		0		0
None	antiepileptics, antidepressants	chinese_headache, chinese_herbal	1	5.9375e-06		0		0		0		0		0		0		0		0		0
None	antiepileptics, antidepressants, others_preventive	None		0		0	1	5.95167e-05		0		0		0		0		0		0		0
None	beta_blocker	None	284	0.00168625	90	0.00225513	52	0.00309487	21	0.00223571	14	0.00233996	9	0.00214695	9	0.00289575	6	0.0024948	6	0.00315126	2	0.00131148
None	beta_blocker	chinese_herbal	176	0.001045	53	0.00132802	32	0.00190454	22	0.00234217	17	0.00284138	11	0.00262405	8	0.002574	2	0.000831601	5	0.00262605	4	0.00262295
None	beta_blocker	chinese_calmingmind		0		0	1	5.95167e-05		0		0		0		0		0		0		0
None	beta_blocker	chinese_headache	58	0.000344375	23	0.000576311	9	0.000535651	2	0.000212925	5	0.000835701	2	0.000477099	3	0.000965251	1	0.0004158	1	0.00052521	6	0.00393443
None	beta_blocker	chinese_headache, chinese_herbal	43	0.000255313	10	0.00025057	3	0.00017855	2	0.000212925	3	0.000501421		0		0	1	0.0004158		0		0
None	beta_blocker	chinese_headache, chinese_calmingmind	1	5.9375e-06		0		0		0		0		0		0		0		0		0
None	beta_blocker	chinese_acupuncture	2	1.1875e-05	1	2.5057e-05		0		0		0	1	0.00023855	1	0.00032175		0		0		0
None	beta_blocker	chinese_acupuncture, chinese_herbal	15	8.90625e-05	5	0.000125285	1	5.95167e-05		0		0		0		0		0		0		0
None	beta_blocker	chinese_acupuncture, chinese_headache, chinese_herbal		0	2	5.0114e-05		0		0		0		0		0		0		0		0
None	beta_blocker, others_preventive	None	4	2.375e-05	2	5.0114e-05	3	0.00017855	3	0.000319387	1	0.00016714	1	0.00023855		0		0	1	0.00052521	1	0.000655738
None	beta_blocker, others_preventive	chinese_herbal	2	1.1875e-05	2	5.0114e-05		0		0		0		0		0		0		0		0
None	beta_blocker, others_preventive	chinese_headache	4	2.375e-05	1	2.5057e-05		0		0	1	0.00016714	1	0.00023855		0		0		0	1	0.000655738
None	beta_blocker, others_preventive	chinese_headache, chinese_herbal	1	5.9375e-06	1	2.5057e-05		0	1	0.000106462		0		0		0		0		0		0
None	beta_blocker, others_preventive	chinese_acupuncture, chinese_headache, chinese_herbal		0	1	2.5057e-05		0		0		0		0		0		0		0		0
None	beta_blocker, antidepressants	None		0		0	1	5.95167e-05		0	1	0.00016714	1	0.00023855	1	0.00032175		0		0	1	0.000655738
None	beta_blocker, antidepressants	chinese_herbal		0	1	2.5057e-05	1	5.95167e-05		0		0	1	0.00023855		0	1	0.0004158		0		0
None	beta_blocker, antiepileptics	None	9	5.34375e-05	7	0.000175399	6	0.0003571	6	0.000638774	3	0.000501421	4	0.000954198	5	0.00160875	5	0.002079	5	0.00262605	3	0.00196721
None	beta_blocker, antiepileptics	chinese_herbal	2	1.1875e-05	1	2.5057e-05		0		0		0		0		0	1	0.0004158		0		0
None	beta_blocker, antiepileptics	chinese_headache	2	1.1875e-05	2	5.0114e-05		0		0	2	0.00033428		0		0		0	1	0.00052521		0
None	beta_blocker, antiepileptics	chinese_headache, chinese_herbal	2	1.1875e-05		0		0		0		0		0		0		0		0		0
None	beta_blocker, antiepileptics, antidepressants	None		0		0		0		0		0	1	0.00023855	1	0.00032175	1	0.0004158	1	0.00052521		0
None	beta_blocker, antiepileptics, antidepressants	chinese_headache		0	1	2.5057e-05		0		0		0		0		0		0		0		0
None	ca_channel_blocker	None	23378	0.138807	5862	0.146884	2555	0.152065	1402	0.14926	803	0.134214	551	0.131441	373	0.120013	277	0.115177	224	0.117647	164	0.107541
None	ca_channel_blocker	chinese_herbal	2886	0.0171356	666	0.016688	288	0.0171408	149	0.0158629	107	0.017884	52	0.0124046	51	0.0164093	23	0.00956341	23	0.0120798	16	0.0104918
None	ca_channel_blocker	chinese_calmingmind	68	0.00040375	16	0.000400912	6	0.0003571	2	0.000212925	1	0.00016714	1	0.00023855	2	0.000643501		0		0	1	0.000655738
None	ca_channel_blocker	chinese_calmingmind, chinese_herbal	15	8.90625e-05	6	0.000150342	3	0.00017855		0	1	0.00016714	2	0.000477099	1	0.00032175	1	0.0004158	1	0.00052521	1	0.000655738
None	ca_channel_blocker	chinese_headache	3002	0.0178244	641	0.0160615	223	0.0132722	110	0.0117108	57	0.00952699	36	0.00858779	21	0.00675676	19	0.00790021	13	0.00682773	7	0.00459016
None	ca_channel_blocker	chinese_headache, chinese_herbal	636	0.00377625	136	0.00340775	54	0.0032139	21	0.00223571	15	0.0025071	7	0.00166985	6	0.0019305	6	0.0024948		0	3	0.00196721
None	ca_channel_blocker	chinese_headache, chinese_calmingmind	5	2.96875e-05	1	2.5057e-05		0		0		0		0		0		0		0		0
None	ca_channel_blocker	chinese_headache, chinese_calmingmind, chinese_herbal		0	1	2.5057e-05		0		0		0		0		0		0		0		0
None	ca_channel_blocker	chinese_acupuncture	103	0.000611563	22	0.000551254	16	0.000952268	8	0.000851698	1	0.00016714	3	0.000715649		0		0		0		0
None	ca_channel_blocker	chinese_acupuncture, chinese_herbal	38	0.000225625	10	0.00025057	2	0.000119033	1	0.000106462	1	0.00016714	2	0.000477099		0		0	1	0.00052521		0
None	ca_channel_blocker	chinese_acupuncture, chinese_calmingmind		0		0	1	5.95167e-05		0		0		0		0		0		0		0
None	ca_channel_blocker	chinese_acupuncture, chinese_calmingmind, chinese_herbal	1	5.9375e-06		0		0		0		0		0		0		0		0		0
None	ca_channel_blocker	chinese_acupuncture, chinese_headache	9	5.34375e-05		0		0		0		0		0		0		0		0		0
None	ca_channel_blocker	chinese_acupuncture, chinese_headache, chinese_herbal	6	3.5625e-05	1	2.5057e-05		0		0	1	0.00016714		0		0		0		0		0
None	ca_channel_blocker, others_preventive	None	255	0.00151406	57	0.00142825	29	0.00172599	14	0.00149047	6	0.00100284	2	0.000477099	1	0.00032175		0		0		0
None	ca_channel_blocker, others_preventive	chinese_herbal	60	0.00035625	7	0.000175399	5	0.000297584	3	0.000319387	2	0.00033428		0		0		0		0	1	0.000655738
None	ca_channel_blocker, others_preventive	chinese_headache	29	0.000172188	6	0.000150342	2	0.000119033	1	0.000106462	1	0.00016714	1	0.00023855		0		0		0		0
None	ca_channel_blocker, others_preventive	chinese_headache, chinese_herbal	5	2.96875e-05	1	2.5057e-05		0		0		0		0		0		0		0		0
None	ca_channel_blocker, others_preventive	chinese_acupuncture	1	5.9375e-06		0		0		0		0		0	1	0.00032175		0		0		0
None	ca_channel_blocker, antidepressants	None	53	0.000314688	15	0.000375855	11	0.000654684	4	0.000425849	3	0.000501421	1	0.00023855	2	0.000643501	3	0.0012474	1	0.00052521		0
None	ca_channel_blocker, antidepressants	chinese_herbal	1	5.9375e-06	1	2.5057e-05		0		0		0		0		0		0		0		0
None	ca_channel_blocker, antidepressants	chinese_headache	2	1.1875e-05		0		0		0	1	0.00016714		0		0		0		0		0
None	ca_channel_blocker, antidepressants, others_preventive	None	1	5.9375e-06		0		0		0		0		0		0		0		0		0
None	ca_channel_blocker, antiepileptics	None	414	0.00245813	152	0.00380866	70	0.00416617	43	0.00457788	32	0.00534849	16	0.00381679	16	0.00514801	8	0.0033264	7	0.00367647	4	0.00262295
None	ca_channel_blocker, antiepileptics	chinese_herbal	22	0.000130625	6	0.000150342	2	0.000119033		0	2	0.00033428		0		0		0		0		0
None	ca_channel_blocker, antiepileptics	chinese_headache	63	0.000374063	20	0.00050114	6	0.0003571	4	0.000425849	1	0.00016714	4	0.000954198		0		0	1	0.00052521		0
None	ca_channel_blocker, antiepileptics	chinese_headache, chinese_herbal	22	0.000130625	5	0.000125285	1	5.95167e-05	1	0.000106462		0		0		0		0		0		0
None	ca_channel_blocker, antiepileptics	chinese_acupuncture, chinese_headache, chinese_herbal	2	1.1875e-05		0		0		0		0		0		0		0		0		0
None	ca_channel_blocker, antiepileptics, others_preventive	None	1	5.9375e-06		0		0	1	0.000106462		0	1	0.00023855		0		0		0		0
None	ca_channel_blocker, antiepileptics, others_preventive	chinese_headache	1	5.9375e-06		0		0		0		0		0		0		0		0		0
None	ca_channel_blocker, antiepileptics, antidepressants	None	2	1.1875e-05	1	2.5057e-05		0	1	0.000106462		0		0		0	1	0.0004158	1	0.00052521		0
None	ca_channel_blocker, antiepileptics, antidepressants	chinese_headache		0	1	2.5057e-05		0		0	1	0.00016714		0		0		0		0		0
None	ca_channel_blocker, beta_blocker	None	226	0.00134188	93	0.0023303	28	0.00166647	26	0.00276802	9	0.00150426	8	0.0019084	7	0.00225225	5	0.002079		0	3	0.00196721
None	ca_channel_blocker, beta_blocker	chinese_herbal	86	0.000510625	22	0.000551254	9	0.000535651	3	0.000319387	7	0.00116998	3	0.000715649		0	1	0.0004158		0		0
None	ca_channel_blocker, beta_blocker	chinese_calmingmind		0		0		0		0		0	1	0.00023855		0		0		0		0
None	ca_channel_blocker, beta_blocker	chinese_calmingmind, chinese_herbal	1	5.9375e-06		0		0		0		0		0		0		0		0		0
None	ca_channel_blocker, beta_blocker	chinese_headache	9	5.34375e-05	5	0.000125285	4	0.000238067	1	0.000106462	3	0.000501421		0		0		0		0		0
None	ca_channel_blocker, beta_blocker	chinese_headache, chinese_herbal	7	4.15625e-05	1	2.5057e-05	1	5.95167e-05		0		0		0		0		0		0		0
None	ca_channel_blocker, beta_blocker	chinese_acupuncture	2	1.1875e-05		0		0		0		0		0		0		0		0		0
None	ca_channel_blocker, beta_blocker	chinese_acupuncture, chinese_herbal	1	5.9375e-06	1	2.5057e-05	1	5.95167e-05		0		0		0		0		0		0		0
None	ca_channel_blocker, beta_blocker, others_preventive	None	7	4.15625e-05	2	5.0114e-05	3	0.00017855		0		0		0		0		0		0		0
None	ca_channel_blocker, beta_blocker, others_preventive	chinese_herbal	1	5.9375e-06		0		0		0		0		0		0		0		0		0
None	ca_channel_blocker, beta_blocker, others_preventive	chinese_headache, chinese_herbal	2	1.1875e-05		0		0		0		0		0		0		0		0		0
None	ca_channel_blocker, beta_blocker, antiepileptics	None	1	5.9375e-06	3	7.5171e-05	3	0.00017855	1	0.000106462	2	0.00033428	2	0.000477099		0		0		0		0
None	ca_channel_blocker, beta_blocker, antiepileptics	chinese_herbal	2	1.1875e-05		0	1	5.95167e-05		0		0		0		0		0		0		0
others_treatment	None	None	230	0.00136563	69	0.00172893	32	0.00190454	16	0.0017034	11	0.00183854	12	0.0028626	10	0.0032175	4	0.0016632	8	0.00420168	5	0.00327869
others_treatment	None	chinese_herbal	76	0.00045125	25	0.000626425	9	0.000535651	3	0.000319387	4	0.000668561	1	0.00023855		0		0	1	0.00052521		0
others_treatment	None	chinese_calmingmind	1	5.9375e-06		0		0		0		0		0		0		0		0		0
others_treatment	None	chinese_headache	19	0.000112813	7	0.000175399		0	1	0.000106462	1	0.00016714	1	0.00023855		0		0		0	1	0.000655738
others_treatment	None	chinese_headache, chinese_herbal	72	0.0004275	20	0.00050114	4	0.000238067	4	0.000425849	3	0.000501421		0		0	1	0.0004158		0		0
others_treatment	None	chinese_acupuncture	9	5.34375e-05	5	0.000125285		0	1	0.000106462		0		0		0		0		0		0
others_treatment	None	chinese_acupuncture, chinese_herbal	4	2.375e-05	1	2.5057e-05	2	0.000119033		0		0		0	1	0.00032175		0		0		0
others_treatment	None	chinese_acupuncture, chinese_headache, chinese_herbal	1	5.9375e-06		0		0		0		0		0	1	0.00032175		0		0		0
others_treatment	others_preventive	None	12	7.125e-05	3	7.5171e-05	1	5.95167e-05	1	0.000106462	4	0.000668561	2	0.000477099	1	0.00032175		0		0		0
others_treatment	others_preventive	chinese_herbal	2	1.1875e-05		0		0		0	1	0.00016714		0		0		0		0		0
others_treatment	antidepressants	None		0	1	2.5057e-05		0	1	0.000106462		0		0		0		0		0		0
others_treatment	antiepileptics	None	15	8.90625e-05	3	7.5171e-05	2	0.000119033		0		0	2	0.000477099	1	0.00032175		0		0		0
others_treatment	antiepileptics	chinese_herbal	3	1.78125e-05		0		0		0		0		0		0		0		0		0
others_treatment	antiepileptics	chinese_calmingmind	1	5.9375e-06		0	1	5.95167e-05		0		0		0		0		0		0		0
others_treatment	antiepileptics	chinese_headache	1	5.9375e-06	1	2.5057e-05		0		0		0		0		0		0		0		0
others_treatment	antiepileptics	chinese_headache, chinese_herbal		0	1	2.5057e-05		0		0		0		0		0		0		0		0
others_treatment	antiepileptics, others_preventive	chinese_headache, chinese_herbal	1	5.9375e-06		0		0		0		0		0		0		0		0		0
others_treatment	antiepileptics, antidepressants	None	1	5.9375e-06		0		0		0		0		0		0		0		0	1	0.000655738
others_treatment	beta_blocker	None	1	5.9375e-06	1	2.5057e-05	1	5.95167e-05		0		0		0		0		0		0		0
others_treatment	beta_blocker	chinese_herbal	1	5.9375e-06		0		0		0		0		0		0		0		0		0
others_treatment	beta_blocker	chinese_headache	1	5.9375e-06		0		0		0		0		0		0		0		0		0
others_treatment	beta_blocker	chinese_acupuncture, chinese_herbal		0	1	2.5057e-05		0		0		0		0		0		0		0		0
others_treatment	ca_channel_blocker	None	52	0.00030875	18	0.000451026	5	0.000297584	5	0.000532311	1	0.00016714	1	0.00023855		0		0		0		0
others_treatment	ca_channel_blocker	chinese_herbal	23	0.000136563	5	0.000125285	3	0.00017855	2	0.000212925	1	0.00016714		0		0		0		0		0
others_treatment	ca_channel_blocker	chinese_calmingmind		0		0	1	5.95167e-05		0		0		0		0		0		0		0
others_treatment	ca_channel_blocker	chinese_headache	4	2.375e-05		0		0		0		0		0		0		0		0		0
others_treatment	ca_channel_blocker	chinese_headache, chinese_herbal	11	6.53125e-05	1	2.5057e-05		0		0		0		0		0		0		0		0
others_treatment	ca_channel_blocker	chinese_acupuncture	1	5.9375e-06	1	2.5057e-05	1	5.95167e-05		0		0		0		0		0		0		0
others_treatment	ca_channel_blocker, others_preventive	None		0	1	2.5057e-05		0	1	0.000106462		0		0		0		0		0		0
others_treatment	ca_channel_blocker, antiepileptics	None	2	1.1875e-05		0		0		0		0		0		0		0		0		0
others_treatment	ca_channel_blocker, beta_blocker	None	1	5.9375e-06		0		0		0		0		0		0		0		0		0
others_treatment	ca_channel_blocker, beta_blocker, others_preventive	chinese_headache, chinese_herbal		0	1	2.5057e-05		0		0		0		0		0		0		0		0
others_treatment	ca_channel_blocker, beta_blocker, antiepileptics	None	1	5.9375e-06		0		0		0		0		0		0		0		0		0
antiemetics	None	None	81	0.000480938	23	0.000576311	6	0.0003571	2	0.000212925	1	0.00016714		0		0		0		0		0
antiemetics	None	chinese_herbal	6	3.5625e-05	4	0.000100228	2	0.000119033	1	0.000106462	1	0.00016714		0		0	1	0.0004158	1	0.00052521		0
antiemetics	None	chinese_calmingmind	1	5.9375e-06		0		0		0		0		0		0		0		0		0
antiemetics	None	chinese_calmingmind, chinese_herbal		0		0	1	5.95167e-05		0		0		0		0		0		0		0
antiemetics	None	chinese_headache	8	4.75e-05	2	5.0114e-05		0		0		0		0		0		0		0		0
antiemetics	None	chinese_headache, chinese_herbal	2	1.1875e-05	3	7.5171e-05		0		0		0		0		0		0		0		0
antiemetics	None	chinese_acupuncture		0	1	2.5057e-05		0		0		0		0		0		0		0		0
antiemetics	None	chinese_acupuncture, chinese_headache, chinese_herbal	1	5.9375e-06		0		0		0		0		0		0		0		0		0
antiemetics	others_preventive	None	7	4.15625e-05	4	0.000100228	2	0.000119033		0		0		0		0		0		0		0
antiemetics	antidepressants	None	1	5.9375e-06		0		0		0		0		0		0		0		0		0
antiemetics	antiepileptics	None	1	5.9375e-06		0		0		0		0		0		0		0		0		0
antiemetics	antiepileptics	chinese_headache	1	5.9375e-06		0		0		0		0		0		0		0		0		0
antiemetics	antiepileptics, others_preventive	None	1	5.9375e-06		0		0		0		0		0		0		0		0		0
antiemetics	beta_blocker	chinese_herbal	1	5.9375e-06		0		0		0		0		0		0		0		0		0
antiemetics	beta_blocker	chinese_headache, chinese_herbal	1	5.9375e-06		0	1	5.95167e-05		0		0		0		0		0		0		0
antiemetics	beta_blocker, others_preventive	chinese_herbal	1	5.9375e-06		0		0		0		0		0		0		0		0		0
antiemetics	ca_channel_blocker	None	67	0.000397813	17	0.000425969	7	0.000416617	3	0.000319387		0	3	0.000715649	2	0.000643501	1	0.0004158		0		0
antiemetics	ca_channel_blocker	chinese_herbal	2	1.1875e-05	1	2.5057e-05		0	1	0.000106462		0		0		0		0		0		0
antiemetics	ca_channel_blocker	chinese_calmingmind	1	5.9375e-06		0		0		0		0		0		0		0		0		0
antiemetics	ca_channel_blocker	chinese_headache	1	5.9375e-06	1	2.5057e-05		0		0		0		0		0		0		0		0
antiemetics	ca_channel_blocker	chinese_headache, chinese_herbal	4	2.375e-05		0		0		0		0		0		0		0		0		0
antiemetics	ca_channel_blocker, others_preventive	None	4	2.375e-05	1	2.5057e-05		0		0		0		0		0		0		0		0
antiemetics	ca_channel_blocker, antiepileptics, others_preventive	None	1	5.9375e-06		0		0		0		0		0		0		0		0		0
antiemetics	ca_channel_blocker, beta_blocker	None		0	1	2.5057e-05		0		0		0		0		0		0		0		0
antiemetics, others_treatment	None	None	5	2.96875e-05	1	2.5057e-05	3	0.00017855	2	0.000212925	1	0.00016714		0		0		0	1	0.00052521		0
antiemetics, others_treatment	others_preventive	None		0	1	2.5057e-05		0		0		0		0		0		0		0		0
antiemetics, others_treatment	ca_channel_blocker	None	1	5.9375e-06		0		0		0		0		0		0		0		0		0
antiemetics, others_treatment	ca_channel_blocker	chinese_herbal		0	1	2.5057e-05		0		0		0		0		0		0		0		0
antiemetics, others_treatment	ca_channel_blocker	chinese_headache, chinese_herbal		0		0		0	1	0.000106462		0		0		0		0		0		0
antiemetics, others_treatment	ca_channel_blocker, others_preventive	chinese_herbal	2	1.1875e-05		0		0		0		0		0		0		0		0		0
cgrp	None	None		0		0	8	0.000476134	3	0.000319387		0	1	0.00023855	3	0.000965251	1	0.0004158		0		0
cgrp	None	chinese_headache		0		0	1	5.95167e-05	1	0.000106462		0		0		0		0		0		0
cgrp	antiepileptics	None		0	1	2.5057e-05	1	5.95167e-05		0	2	0.00033428		0	1	0.00032175		0	2	0.00105042		0
cgrp	antiepileptics	chinese_headache		0		0		0		0	1	0.00016714		0	1	0.00032175		0		0		0
cgrp	ca_channel_blocker, antiepileptics	None		0		0	1	5.95167e-05		0		0		0		0		0		0		0
triptan	None	None	1009	0.00599094	400	0.0100228	205	0.0122009	144	0.0153306	119	0.0198897	81	0.0193225	71	0.0228443	52	0.0216216	42	0.0220588	37	0.0242623
triptan	None	chinese_herbal	36	0.00021375	15	0.000375855	3	0.00017855	3	0.000319387	4	0.000668561	2	0.000477099	1	0.00032175	1	0.0004158		0		0
triptan	None	chinese_calmingmind	19	0.000112813	1	2.5057e-05	1	5.95167e-05		0		0		0	1	0.00032175		0		0		0
triptan	None	chinese_calmingmind, chinese_herbal	1	5.9375e-06		0		0		0		0		0		0		0		0		0
triptan	None	chinese_headache	96	0.00057	28	0.000701596	14	0.000833234	9	0.00095816	7	0.00116998	5	0.00119275	1	0.00032175	5	0.002079	1	0.00052521	2	0.00131148
triptan	None	chinese_headache, chinese_herbal	34	0.000201875	2	5.0114e-05	3	0.00017855		0		0		0		0		0		0		0
triptan	others_preventive	None	2	1.1875e-05	2	5.0114e-05		0		0		0		0		0	1	0.0004158	1	0.00052521		0
triptan	others_preventive	chinese_herbal		0		0		0		0		0		0		0		0		0	1	0.000655738
triptan	others_preventive	chinese_headache, chinese_herbal	1	5.9375e-06		0		0		0		0		0		0		0		0		0
triptan	antidepressants	None	7	4.15625e-05	4	0.000100228	1	5.95167e-05	2	0.000212925	1	0.00016714	1	0.00023855	2	0.000643501	1	0.0004158	2	0.00105042		0
triptan	antidepressants	chinese_herbal		0	1	2.5057e-05		0		0		0		0		0		0		0		0
triptan	antiepileptics	None	60	0.00035625	22	0.000551254	9	0.000535651	17	0.00180986	7	0.00116998	10	0.0023855	10	0.0032175	7	0.0029106	6	0.00315126	1	0.000655738
triptan	antiepileptics	chinese_herbal	3	1.78125e-05	1	2.5057e-05		0		0	2	0.00033428		0		0	1	0.0004158		0	1	0.000655738
triptan	antiepileptics	chinese_headache	3	1.78125e-05	1	2.5057e-05		0		0	2	0.00033428		0		0		0		0		0
triptan	antiepileptics, others_preventive	None		0		0		0		0		0	1	0.00023855	1	0.00032175		0		0		0
triptan	antiepileptics, others_preventive	chinese_herbal	1	5.9375e-06		0		0		0		0		0		0		0		0		0
triptan	antiepileptics, antidepressants	None	10	5.9375e-05	3	7.5171e-05	4	0.000238067	3	0.000319387		0	2	0.000477099	1	0.00032175	1	0.0004158	1	0.00052521	2	0.00131148
triptan	antiepileptics, antidepressants	chinese_headache	1	5.9375e-06		0		0		0		0		0		0		0		0		0
triptan	beta_blocker	None	10	5.9375e-05	1	2.5057e-05	2	0.000119033	1	0.000106462	2	0.00033428	1	0.00023855		0		0		0		0
triptan	beta_blocker	chinese_herbal	2	1.1875e-05		0		0	1	0.000106462		0		0		0		0		0		0
triptan	beta_blocker, antiepileptics	None		0		0	1	5.95167e-05		0		0		0		0		0		0		0
triptan	ca_channel_blocker	None	632	0.0037525	136	0.00340775	56	0.00333294	33	0.00351325	10	0.0016714	9	0.00214695	7	0.00225225	6	0.0024948	9	0.00472689	6	0.00393443
triptan	ca_channel_blocker	chinese_herbal	6	3.5625e-05	7	0.000175399	1	5.95167e-05	1	0.000106462	1	0.00016714	2	0.000477099		0		0		0	1	0.000655738
triptan	ca_channel_blocker	chinese_calmingmind	16	9.5e-05		0	1	5.95167e-05		0		0		0		0		0		0		0
triptan	ca_channel_blocker	chinese_headache	63	0.000374063	12	0.000300684	8	0.000476134	2	0.000212925	2	0.00033428	1	0.00023855	2	0.000643501		0		0		0
triptan	ca_channel_blocker	chinese_headache, chinese_herbal	12	7.125e-05		0		0		0		0		0		0		0		0		0
triptan	ca_channel_blocker, others_preventive	None	3	1.78125e-05		0		0		0		0		0		0		0		0		0
triptan	ca_channel_blocker, others_preventive	chinese_herbal		0	1	2.5057e-05		0		0		0		0		0		0		0		0
triptan	ca_channel_blocker, others_preventive	chinese_headache	1	5.9375e-06		0		0		0		0		0		0		0		0		0
triptan	ca_channel_blocker, antidepressants	None	11	6.53125e-05	3	7.5171e-05	4	0.000238067	3	0.000319387		0	1	0.00023855	1	0.00032175		0		0		0
triptan	ca_channel_blocker, antiepileptics	None	7	4.15625e-05	1	2.5057e-05	2	0.000119033	1	0.000106462	1	0.00016714		0		0	1	0.0004158	1	0.00052521		0
triptan	ca_channel_blocker, antiepileptics	chinese_calmingmind	1	5.9375e-06		0		0		0		0		0		0		0		0		0
triptan	ca_channel_blocker, antiepileptics, antidepressants	None	1	5.9375e-06		0		0		0		0		0		0		0		0		0
triptan	ca_channel_blocker, beta_blocker	None	1	5.9375e-06		0		0		0	1	0.00016714		0		0		0		0	1	0.000655738
triptan	ca_channel_blocker, beta_blocker	chinese_herbal	1	5.9375e-06		0		0		0		0		0		0		0		0		0
triptan	ca_channel_blocker, beta_blocker	chinese_calmingmind		0		0		0		0		0		0	1	0.00032175		0		0		0
triptan	ca_channel_blocker, beta_blocker, antiepileptics	chinese_herbal	1	5.9375e-06		0		0		0		0		0		0		0		0		0
triptan, others_treatment	None	None	1	5.9375e-06	1	2.5057e-05		0		0		0		0		0		0		0		0
triptan, others_treatment	None	chinese_herbal	1	5.9375e-06		0		0		0		0	1	0.00023855		0		0		0		0
triptan, others_treatment	None	chinese_headache	1	5.9375e-06		0		0		0		0		0		0		0		0		0
triptan, others_treatment	None	chinese_headache, chinese_herbal	1	5.9375e-06		0		0		0		0		0		0		0		0		0
triptan, others_treatment	beta_blocker, others_preventive	chinese_herbal	1	5.9375e-06		0		0		0		0		0		0		0		0		0
triptan, others_treatment	ca_channel_blocker	None		0		0		0		0	1	0.00016714		0		0		0		0		0
triptan, others_treatment	ca_channel_blocker	chinese_herbal	1	5.9375e-06		0		0		0		0		0		0		0		0		0
triptan, others_treatment	ca_channel_blocker	chinese_headache	1	5.9375e-06		0		0		0		0		0		0		0		0		0
triptan, others_treatment	ca_channel_blocker, others_preventive	None		0	1	2.5057e-05		0		0		0		0		0		0		0		0
triptan, antiemetics	None	None	1	5.9375e-06		0		0		0		0		0		0		0		0		0
triptan, cgrp	None	None		0		0		0		0		0		0		0		0		0	1	0.000655738
opioids	None	None	445	0.00264219	118	0.00295673	81	0.00482085	51	0.00542958	34	0.00568277	28	0.00667939	22	0.00707851	19	0.00790021	17	0.00892857	14	0.00918033
opioids	None	chinese_herbal	37	0.000219688	6	0.000150342	2	0.000119033	1	0.000106462		0	1	0.00023855		0		0	1	0.00052521		0
opioids	None	chinese_calmingmind, chinese_herbal	1	5.9375e-06	1	2.5057e-05	1	5.95167e-05	1	0.000106462	1	0.00016714		0		0		0		0		0
opioids	None	chinese_headache	43	0.000255313	3	7.5171e-05		0	2	0.000212925		0		0		0		0		0		0
opioids	None	chinese_headache, chinese_herbal	10	5.9375e-05	8	0.000200456		0		0		0		0		0		0		0		0
opioids	None	chinese_acupuncture	4	2.375e-05	2	5.0114e-05		0		0		0		0		0		0		0		0
opioids	None	chinese_acupuncture, chinese_herbal	1	5.9375e-06		0		0		0		0		0		0		0		0		0
opioids	None	chinese_acupuncture, chinese_headache, chinese_herbal	1	5.9375e-06		0		0		0		0		0		0		0		0		0
opioids	others_preventive	None	2	1.1875e-05		0		0		0		0		0		0		0		0		0
opioids	others_preventive	chinese_herbal	1	5.9375e-06		0		0		0		0		0		0		0		0		0
opioids	others_preventive	chinese_headache	1	5.9375e-06		0		0		0		0		0		0		0		0		0
opioids	antidepressants	None	1	5.9375e-06	2	5.0114e-05	1	5.95167e-05		0		0		0		0		0		0		0
opioids	antidepressants	chinese_herbal	1	5.9375e-06		0		0		0		0		0		0		0		0		0
opioids	antiepileptics	None	6	3.5625e-05	1	2.5057e-05	1	5.95167e-05		0		0	1	0.00023855	1	0.00032175	1	0.0004158		0		0
opioids	antiepileptics	chinese_herbal	1	5.9375e-06		0		0		0		0		0		0		0		0		0
opioids	antiepileptics, others_preventive	chinese_headache, chinese_herbal	1	5.9375e-06		0		0		0		0		0		0		0		0		0
opioids	beta_blocker	None	2	1.1875e-05	1	2.5057e-05		0		0		0		0		0		0		0		0
opioids	beta_blocker	chinese_herbal	1	5.9375e-06		0		0		0		0		0		0		0		0		0
opioids	beta_blocker, antiepileptics, antidepressants	None	1	5.9375e-06		0		0		0		0		0		0		0		0		0
opioids	ca_channel_blocker	None	70	0.000415625	15	0.000375855	1	5.95167e-05	1	0.000106462	2	0.00033428		0	1	0.00032175	1	0.0004158		0		0
opioids	ca_channel_blocker	chinese_herbal	9	5.34375e-05		0		0		0		0		0		0		0		0		0
opioids	ca_channel_blocker	chinese_calmingmind	1	5.9375e-06	1	2.5057e-05		0		0		0		0		0		0		0		0
opioids	ca_channel_blocker	chinese_headache	18	0.000106875	3	7.5171e-05		0		0		0		0		0		0		0		0
opioids	ca_channel_blocker	chinese_headache, chinese_herbal	2	1.1875e-05		0		0		0		0		0		0		0		0		0
opioids	ca_channel_blocker, antiepileptics	chinese_acupuncture, chinese_headache, chinese_herbal	1	5.9375e-06		0		0		0		0		0		0		0		0		0
opioids, others_treatment	None	None	5	2.96875e-05	1	2.5057e-05	1	5.95167e-05		0		0		0		0	1	0.0004158		0		0
opioids, others_treatment	None	chinese_herbal	1	5.9375e-06		0		0		0		0		0		0		0		0		0
opioids, others_treatment	None	chinese_headache, chinese_herbal	3	1.78125e-05		0		0		0		0		0		0		0		0		0
opioids, others_treatment	others_preventive	None	3	1.78125e-05		0		0		0		0		0		0		0		0		0
opioids, others_treatment	others_preventive	chinese_headache, chinese_herbal	1	5.9375e-06		0		0		0		0		0		0		0		0		0
opioids, others_treatment	ca_channel_blocker	None	2	1.1875e-05		0		0		0		0		0		0		0		0		0
opioids, others_treatment	ca_channel_blocker	chinese_headache, chinese_herbal	1	5.9375e-06		0		0		0		0		0		0		0		0		0
opioids, others_treatment	ca_channel_blocker, antiepileptics, antidepressants	chinese_acupuncture, chinese_herbal	1	5.9375e-06		0		0		0		0		0		0		0		0		0
opioids, antiemetics	None	None	11	6.53125e-05	1	2.5057e-05		0		0		0		0	1	0.00032175		0	1	0.00052521	1	0.000655738
opioids, antiemetics	None	chinese_herbal		0	1	2.5057e-05		0		0		0		0		0		0		0		0
opioids, antiemetics	None	chinese_headache	1	5.9375e-06		0		0		0		0		0		0		0		0		0
opioids, antiemetics	others_preventive	None	1	5.9375e-06		0		0		0		0		0		0		0		0		0
opioids, antiemetics	ca_channel_blocker	None		0	1	2.5057e-05		0	1	0.000106462		0		0		0		0		0		0
opioids, antiemetics, others_treatment	None	None	1	5.9375e-06	1	2.5057e-05	2	0.000119033	2	0.000212925		0	1	0.00023855		0		0		0		0
opioids, antiemetics, others_treatment	antiepileptics	chinese_headache, chinese_herbal	1	5.9375e-06		0		0		0		0		0		0		0		0		0
opioids, antiemetics, others_treatment	antiepileptics, others_preventive	None		0		0		0		0		0		0	1	0.00032175		0		0		0
opioids, antiemetics, others_treatment	ca_channel_blocker	None	1	5.9375e-06		0		0		0		0		0		0		0		0		0
opioids, cgrp	None	None		0		0		0	1	0.000106462		0		0		0		0		0		0
opioids, triptan	None	None	9	5.34375e-05	4	0.000100228	2	0.000119033	2	0.000212925	2	0.00033428	2	0.000477099	1	0.00032175		0	1	0.00052521		0
opioids, triptan	ca_channel_blocker	None	3	1.78125e-05	1	2.5057e-05		0	1	0.000106462		0		0		0		0		0		0
opioids, triptan, antiemetics	ca_channel_blocker	None	1	5.9375e-06		0		0		0		0		0		0		0		0		0
opioids, triptan, antiemetics	ca_channel_blocker	chinese_headache, chinese_herbal	1	5.9375e-06		0		0		0		0		0		0		0		0		0
ergotamine	None	None	938	0.00556938	281	0.00704102	106	0.00630877	76	0.00809113	42	0.00701989	28	0.00667939	18	0.00579151	18	0.00748441	7	0.00367647	7	0.00459016
ergotamine	None	chinese_herbal	102	0.000605625	26	0.000651482	11	0.000654684	5	0.000532311	4	0.000668561	4	0.000954198	5	0.00160875		0	4	0.00210084		0
ergotamine	None	chinese_calmingmind	2	1.1875e-05		0		0		0		0		0		0		0		0		0
ergotamine	None	chinese_headache	151	0.000896563	39	0.000977223	9	0.000535651	5	0.000532311	3	0.000501421	4	0.000954198	3	0.000965251	2	0.000831601		0		0
ergotamine	None	chinese_headache, chinese_herbal	17	0.000100938	11	0.000275627		0	1	0.000106462		0		0		0		0	1	0.00052521		0
ergotamine	None	chinese_acupuncture	3	1.78125e-05		0		0		0		0		0		0		0		0		0
ergotamine	None	chinese_acupuncture, chinese_herbal	1	5.9375e-06		0		0		0		0		0		0		0		0		0
ergotamine	None	chinese_acupuncture, chinese_headache, chinese_herbal	1	5.9375e-06		0		0		0		0		0		0		0		0		0
ergotamine	others_preventive	None	15	8.90625e-05		0		0		0		0		0		0		0		0	1	0.000655738
ergotamine	others_preventive	chinese_herbal	2	1.1875e-05	1	2.5057e-05		0	1	0.000106462		0	1	0.00023855		0		0		0		0
ergotamine	antidepressants	None	29	0.000172188	9	0.000225513	5	0.000297584		0		0		0		0		0		0		0
ergotamine	antidepressants	chinese_herbal		0		0		0		0		0	1	0.00023855		0		0		0		0
ergotamine	antiepileptics	None	39	0.000231563	19	0.000476083	9	0.000535651	5	0.000532311	2	0.00033428	4	0.000954198		0		0		0		0
ergotamine	antiepileptics	chinese_herbal	2	1.1875e-05		0		0		0		0		0		0		0		0		0
ergotamine	antiepileptics	chinese_headache	1	5.9375e-06		0	1	5.95167e-05		0		0		0		0		0		0		0
ergotamine	antiepileptics, others_preventive	chinese_calmingmind, chinese_herbal	1	5.9375e-06		0		0		0		0		0		0		0		0		0
ergotamine	antiepileptics, antidepressants	None	1	5.9375e-06		0		0		0		0		0		0		0		0		0
ergotamine	beta_blocker	None	5	2.96875e-05	4	0.000100228	1	5.95167e-05		0		0		0		0	1	0.0004158		0		0
ergotamine	beta_blocker	chinese_herbal	3	1.78125e-05	2	5.0114e-05	3	0.00017855		0		0		0		0		0		0	1	0.000655738
ergotamine	beta_blocker	chinese_headache	2	1.1875e-05		0		0		0		0		0		0		0		0		0
ergotamine	beta_blocker	chinese_headache, chinese_herbal		0	1	2.5057e-05		0		0		0		0		0		0		0		0
ergotamine	ca_channel_blocker	None	176	0.001045	51	0.00127791	12	0.000714201	11	0.00117108	8	0.00133712	3	0.000715649	1	0.00032175		0		0		0
ergotamine	ca_channel_blocker	chinese_herbal	6	3.5625e-05	1	2.5057e-05	1	5.95167e-05	1	0.000106462		0	1	0.00023855		0		0		0		0
ergotamine	ca_channel_blocker	chinese_calmingmind	2	1.1875e-05		0		0		0		0		0		0		0		0		0
ergotamine	ca_channel_blocker	chinese_headache	20	0.00011875	3	7.5171e-05	5	0.000297584	2	0.000212925		0		0		0		0		0		0
ergotamine	ca_channel_blocker	chinese_headache, chinese_herbal	1	5.9375e-06	1	2.5057e-05		0		0		0		0		0		0		0		0
ergotamine	ca_channel_blocker	chinese_acupuncture, chinese_herbal	2	1.1875e-05		0		0		0		0		0		0		0		0		0
ergotamine	ca_channel_blocker	chinese_acupuncture, chinese_headache, chinese_calmingmind, chinese_herbal	1	5.9375e-06		0		0		0		0		0		0		0		0		0
ergotamine	ca_channel_blocker, others_preventive	chinese_herbal	1	5.9375e-06		0		0		0		0		0		0		0		0		0
ergotamine	ca_channel_blocker, antidepressants	None	1	5.9375e-06		0	2	0.000119033		0		0		0		0		0		0		0
ergotamine	ca_channel_blocker, antiepileptics	None	4	2.375e-05		0		0		0		0		0		0		0		0		0
ergotamine	ca_channel_blocker, antiepileptics	chinese_headache	1	5.9375e-06	1	2.5057e-05		0		0		0		0		0		0		0		0
ergotamine	ca_channel_blocker, beta_blocker	None	1	5.9375e-06	3	7.5171e-05		0		0		0		0		0		0		0		0
ergotamine, others_treatment	None	None	2	1.1875e-05	1	2.5057e-05		0		0		0		0	1	0.00032175		0		0		0
ergotamine, others_treatment	None	chinese_headache	1	5.9375e-06		0		0		0		0		0		0		0		0		0
ergotamine, others_treatment	antiepileptics	chinese_headache, chinese_herbal	1	5.9375e-06		0		0		0		0		0		0		0		0		0
ergotamine, others_treatment	ca_channel_blocker	None	1	5.9375e-06		0		0		0		0		0		0		0		0		0
ergotamine, others_treatment	ca_channel_blocker	chinese_acupuncture, chinese_herbal	1	5.9375e-06		0		0		0		0		0		0		0		0		0
ergotamine, antiemetics	None	None	1	5.9375e-06		0		0		0		0		0		0		0		0		0
ergotamine, antiemetics	None	chinese_headache, chinese_herbal	1	5.9375e-06		0		0		0		0		0		0		0		0		0
ergotamine, antiemetics, others_treatment	ca_channel_blocker, antiepileptics, antidepressants	None		0		0		0		0		0	1	0.00023855		0		0		0		0
ergotamine, triptan	None	None	14	8.3125e-05	7	0.000175399	3	0.00017855	3	0.000319387	2	0.00033428	1	0.00023855	1	0.00032175	2	0.000831601		0	1	0.000655738
ergotamine, triptan	None	chinese_headache	1	5.9375e-06	3	7.5171e-05	2	0.000119033	1	0.000106462	1	0.00016714		0		0		0		0		0
ergotamine, triptan	None	chinese_headache, chinese_herbal		0	1	2.5057e-05	1	5.95167e-05		0		0		0		0		0		0		0
ergotamine, triptan	antiepileptics	None	2	1.1875e-05		0		0		0		0		0		0		0		0		0
ergotamine, triptan	ca_channel_blocker	None	4	2.375e-05	2	5.0114e-05		0		0		0		0		0		0	1	0.00052521		0
ergotamine, triptan	ca_channel_blocker	chinese_herbal	1	5.9375e-06		0		0		0		0		0		0		0		0		0
ergotamine, triptan	ca_channel_blocker, antidepressants	None		0		0	1	5.95167e-05	1	0.000106462		0		0		0		0		0		0
ergotamine, triptan, others_treatment	antidepressants	chinese_herbal	1	5.9375e-06		0		0		0		0		0		0		0		0		0
ergotamine, opioids	None	None	1	5.9375e-06		0	1	5.95167e-05		0		0		0		0		0		0		0
ergotamine, opioids	None	chinese_herbal	1	5.9375e-06		0		0		0		0		0		0		0		0		0
ergotamine, opioids	ca_channel_blocker	None		0	1	2.5057e-05		0		0		0		0		0		0		0		0
NSAIDs	None	None	39552	0.23484	6239	0.156331	2169	0.129092	1033	0.109976	640	0.10697	467	0.111403	329	0.105856	244	0.101455	199	0.104517	160	0.104918
NSAIDs	None	chinese_herbal	3889	0.0230909	585	0.0146583	206	0.0122604	117	0.0124561	63	0.0105298	34	0.00811069	35	0.0112613	27	0.0112266	18	0.00945378	14	0.00918033
NSAIDs	None	chinese_calmingmind	54	0.000320625	9	0.000225513	1	5.95167e-05	1	0.000106462	1	0.00016714		0	3	0.000965251		0		0		0
NSAIDs	None	chinese_calmingmind, chinese_herbal	28	0.00016625	4	0.000100228	1	5.95167e-05	1	0.000106462		0	1	0.00023855		0		0		0		0
NSAIDs	None	chinese_headache	1463	0.00868657	269	0.00674033	96	0.00571361	52	0.00553604	33	0.00551563	18	0.00429389	8	0.002574	11	0.0045738	8	0.00420168	9	0.00590164
NSAIDs	None	chinese_headache, chinese_herbal	658	0.00390688	99	0.00248064	37	0.00220212	14	0.00149047	12	0.00200568	7	0.00166985	5	0.00160875	3	0.0012474	5	0.00262605	4	0.00262295
NSAIDs	None	chinese_headache, chinese_calmingmind	3	1.78125e-05	1	2.5057e-05	1	5.95167e-05		0		0		0		0		0		0		0
NSAIDs	None	chinese_acupuncture	235	0.00139531	54	0.00135308	21	0.00124985	15	0.00159693	9	0.00150426	4	0.000954198	2	0.000643501	4	0.0016632	1	0.00052521	3	0.00196721
NSAIDs	None	chinese_acupuncture, chinese_herbal	62	0.000368125	15	0.000375855	7	0.000416617	3	0.000319387	1	0.00016714	2	0.000477099	1	0.00032175	2	0.000831601		0		0
NSAIDs	None	chinese_acupuncture, chinese_headache	8	4.75e-05	1	2.5057e-05	2	0.000119033	1	0.000106462		0		0		0		0		0		0
NSAIDs	None	chinese_acupuncture, chinese_headache, chinese_herbal	12	7.125e-05	2	5.0114e-05		0		0	1	0.00016714		0		0		0		0		0
NSAIDs	others_preventive	None	505	0.00299844	68	0.00170388	27	0.00160695	13	0.00138401	9	0.00150426	5	0.00119275	4	0.001287	1	0.0004158	2	0.00105042		0
NSAIDs	others_preventive	chinese_herbal	68	0.00040375	6	0.000150342	4	0.000238067	1	0.000106462		0	1	0.00023855	2	0.000643501		0		0	1	0.000655738
NSAIDs	others_preventive	chinese_calmingmind, chinese_herbal	1	5.9375e-06		0		0		0		0		0		0		0		0		0
NSAIDs	others_preventive	chinese_headache	11	6.53125e-05	3	7.5171e-05		0		0		0		0		0		0		0		0
NSAIDs	others_preventive	chinese_headache, chinese_herbal	8	4.75e-05		0		0		0		0		0		0		0		0		0
NSAIDs	others_preventive	chinese_acupuncture	3	1.78125e-05		0		0		0		0		0		0		0		0		0
NSAIDs	others_preventive	chinese_acupuncture, chinese_herbal	2	1.1875e-05		0		0		0		0		0		0		0		0		0
NSAIDs	others_preventive	chinese_acupuncture, chinese_headache, chinese_herbal	1	5.9375e-06		0		0		0		0		0		0		0		0		0
NSAIDs	antidepressants	None	19	0.000112813	8	0.000200456		0	2	0.000212925		0		0		0	1	0.0004158		0		0
NSAIDs	antidepressants	chinese_herbal	3	1.78125e-05		0	1	5.95167e-05		0	1	0.00016714		0		0		0		0		0
NSAIDs	antidepressants	chinese_headache		0		0		0	1	0.000106462		0		0		0		0		0		0
NSAIDs	antidepressants	chinese_headache, chinese_calmingmind		0		0		0	1	0.000106462		0		0		0		0		0		0
NSAIDs	antiepileptics	None	215	0.00127656	61	0.00152848	19	0.00113082	17	0.00180986	6	0.00100284	10	0.0023855	2	0.000643501	8	0.0033264	2	0.00105042	1	0.000655738
NSAIDs	antiepileptics	chinese_herbal	15	8.90625e-05	5	0.000125285	1	5.95167e-05	3	0.000319387	1	0.00016714		0		0		0		0		0
NSAIDs	antiepileptics	chinese_headache	21	0.000124688	4	0.000100228	5	0.000297584	1	0.000106462	3	0.000501421		0		0	1	0.0004158		0		0
NSAIDs	antiepileptics	chinese_headache, chinese_herbal	12	7.125e-05	5	0.000125285	1	5.95167e-05	1	0.000106462		0		0		0		0		0		0
NSAIDs	antiepileptics	chinese_acupuncture		0	1	2.5057e-05	1	5.95167e-05		0		0		0		0		0		0		0
NSAIDs	antiepileptics	chinese_acupuncture, chinese_herbal		0	1	2.5057e-05		0		0		0		0		0		0		0		0
NSAIDs	antiepileptics	chinese_acupuncture, chinese_headache, chinese_herbal		0		0	1	5.95167e-05		0		0		0		0		0		0		0
NSAIDs	antiepileptics, others_preventive	None	1	5.9375e-06		0		0		0		0		0		0		0		0		0
NSAIDs	antiepileptics, others_preventive	chinese_herbal	1	5.9375e-06		0		0		0		0		0		0		0		0		0
NSAIDs	antiepileptics, others_preventive	chinese_headache		0		0	1	5.95167e-05		0		0		0		0		0		0		0
NSAIDs	antiepileptics, others_preventive	chinese_headache, chinese_herbal	2	1.1875e-05		0		0		0		0		0		0		0		0		0
NSAIDs	antiepileptics, antidepressants	None	4	2.375e-05	1	2.5057e-05	1	5.95167e-05		0		0	1	0.00023855		0		0		0		0
NSAIDs	antiepileptics, antidepressants	chinese_herbal		0		0	1	5.95167e-05		0		0		0	1	0.00032175		0		0	1	0.000655738
NSAIDs	antiepileptics, antidepressants	chinese_headache, chinese_herbal	1	5.9375e-06		0		0		0		0		0		0		0		0		0
NSAIDs	antiepileptics, antidepressants, others_preventive	chinese_herbal		0		0	1	5.95167e-05	1	0.000106462	1	0.00016714		0		0		0		0		0
NSAIDs	beta_blocker	None	361	0.00214344	50	0.00125285	26	0.00154743	11	0.00117108	8	0.00133712	8	0.0019084	1	0.00032175	1	0.0004158	1	0.00052521		0
NSAIDs	beta_blocker	chinese_herbal	113	0.000670938	20	0.00050114	7	0.000416617	6	0.000638774	2	0.00033428		0	1	0.00032175		0	1	0.00052521	1	0.000655738
NSAIDs	beta_blocker	chinese_headache	9	5.34375e-05	3	7.5171e-05	2	0.000119033	1	0.000106462		0	1	0.00023855		0		0	1	0.00052521		0
NSAIDs	beta_blocker	chinese_headache, chinese_herbal	11	6.53125e-05	3	7.5171e-05	1	5.95167e-05	1	0.000106462		0		0		0		0		0		0
NSAIDs	beta_blocker	chinese_acupuncture	4	2.375e-05		0		0		0		0		0		0		0		0		0
NSAIDs	beta_blocker	chinese_acupuncture, chinese_herbal	2	1.1875e-05	1	2.5057e-05		0		0		0		0		0		0		0		0
NSAIDs	beta_blocker	chinese_acupuncture, chinese_headache, chinese_herbal	1	5.9375e-06		0		0		0		0		0		0		0		0		0
NSAIDs	beta_blocker, others_preventive	None	10	5.9375e-05	2	5.0114e-05	1	5.95167e-05	1	0.000106462		0		0		0		0		0		0
NSAIDs	beta_blocker, others_preventive	chinese_herbal	3	1.78125e-05		0		0		0		0		0		0		0		0		0
NSAIDs	beta_blocker, others_preventive	chinese_headache, chinese_herbal	2	1.1875e-05		0		0		0		0		0		0		0		0		0
NSAIDs	beta_blocker, antidepressants	None	1	5.9375e-06		0		0		0		0		0		0		0		0		0
NSAIDs	beta_blocker, antiepileptics	None	2	1.1875e-05		0		0	1	0.000106462		0		0		0		0	1	0.00052521	1	0.000655738
NSAIDs	beta_blocker, antiepileptics	chinese_herbal	1	5.9375e-06		0		0		0		0		0		0		0		0		0
NSAIDs	beta_blocker, antiepileptics	chinese_headache, chinese_herbal	1	5.9375e-06		0		0		0		0		0		0		0		0		0
NSAIDs	beta_blocker, antiepileptics	chinese_acupuncture, chinese_herbal	1	5.9375e-06		0		0		0		0		0		0		0		0		0
NSAIDs	beta_blocker, antiepileptics, others_preventive	chinese_herbal	1	5.9375e-06		0		0		0		0		0		0		0		0		0
NSAIDs	beta_blocker, antiepileptics, antidepressants	chinese_headache, chinese_herbal	1	5.9375e-06		0		0		0		0		0		0		0		0		0
NSAIDs	ca_channel_blocker	None	4120	0.0244625	914	0.0229021	341	0.0202952	185	0.0196955	111	0.0185526	72	0.0171756	47	0.0151223	35	0.014553	25	0.0131303	17	0.0111475
NSAIDs	ca_channel_blocker	chinese_herbal	415	0.00246406	91	0.00228019	31	0.00184502	17	0.00180986	12	0.00200568	5	0.00119275	2	0.000643501	5	0.002079	3	0.00157563	2	0.00131148
NSAIDs	ca_channel_blocker	chinese_calmingmind	5	2.96875e-05		0	3	0.00017855		0		0		0		0		0		0		0
NSAIDs	ca_channel_blocker	chinese_calmingmind, chinese_herbal	1	5.9375e-06		0		0		0		0		0		0		0		0		0
NSAIDs	ca_channel_blocker	chinese_headache	364	0.00216125	62	0.00155353	24	0.0014284	11	0.00117108	6	0.00100284	1	0.00023855	2	0.000643501	1	0.0004158		0		0
NSAIDs	ca_channel_blocker	chinese_headache, chinese_herbal	75	0.000445313	12	0.000300684	3	0.00017855	4	0.000425849	2	0.00033428		0		0	1	0.0004158		0		0
NSAIDs	ca_channel_blocker	chinese_headache, chinese_calmingmind, chinese_herbal	1	5.9375e-06		0		0		0		0		0		0		0		0		0
NSAIDs	ca_channel_blocker	chinese_acupuncture	15	8.90625e-05	2	5.0114e-05	1	5.95167e-05		0	1	0.00016714		0		0		0		0		0
NSAIDs	ca_channel_blocker	chinese_acupuncture, chinese_herbal	11	6.53125e-05	1	2.5057e-05	1	5.95167e-05		0		0	1	0.00023855		0		0		0	1	0.000655738
NSAIDs	ca_channel_blocker	chinese_acupuncture, chinese_headache, chinese_herbal	7	4.15625e-05		0		0		0		0		0		0		0		0		0
NSAIDs	ca_channel_blocker, others_preventive	None	32	0.00019	11	0.000275627	7	0.000416617	1	0.000106462	1	0.00016714		0	1	0.00032175	1	0.0004158		0		0
NSAIDs	ca_channel_blocker, others_preventive	chinese_herbal	8	4.75e-05		0	2	0.000119033		0		0		0		0		0		0		0
NSAIDs	ca_channel_blocker, others_preventive	chinese_calmingmind, chinese_herbal	1	5.9375e-06		0		0		0		0		0		0		0		0		0
NSAIDs	ca_channel_blocker, others_preventive	chinese_headache	2	1.1875e-05	1	2.5057e-05		0		0		0		0		0		0		0		0
NSAIDs	ca_channel_blocker, others_preventive	chinese_headache, chinese_herbal	3	1.78125e-05		0		0		0		0		0		0		0		0		0
NSAIDs	ca_channel_blocker, antidepressants	None	6	3.5625e-05		0		0		0		0		0		0		0		0		0
NSAIDs	ca_channel_blocker, antidepressants	chinese_herbal		0	1	2.5057e-05		0		0		0		0		0		0		0		0
NSAIDs	ca_channel_blocker, antidepressants	chinese_headache	1	5.9375e-06		0		0		0		0		0		0		0		0		0
NSAIDs	ca_channel_blocker, antidepressants	chinese_acupuncture	1	5.9375e-06		0		0		0		0		0		0		0		0		0
NSAIDs	ca_channel_blocker, antidepressants	chinese_acupuncture, chinese_herbal	1	5.9375e-06		0		0		0		0		0		0		0		0		0
NSAIDs	ca_channel_blocker, antidepressants, others_preventive	None	1	5.9375e-06		0		0		0		0		0		0		0		0		0
NSAIDs	ca_channel_blocker, antiepileptics	None	21	0.000124688	9	0.000225513	5	0.000297584	2	0.000212925	1	0.00016714	1	0.00023855		0	1	0.0004158		0		0
NSAIDs	ca_channel_blocker, antiepileptics	chinese_herbal	3	1.78125e-05	1	2.5057e-05		0		0		0		0		0		0		0		0
NSAIDs	ca_channel_blocker, antiepileptics	chinese_headache	5	2.96875e-05		0		0		0		0		0		0		0		0		0
NSAIDs	ca_channel_blocker, antiepileptics	chinese_headache, chinese_herbal	5	2.96875e-05		0	1	5.95167e-05		0		0		0		0		0		0		0
NSAIDs	ca_channel_blocker, antiepileptics	chinese_headache, chinese_calmingmind, chinese_herbal	1	5.9375e-06		0		0		0		0		0		0		0		0		0
NSAIDs	ca_channel_blocker, antiepileptics	chinese_acupuncture, chinese_herbal	1	5.9375e-06		0		0		0		0		0		0		0		0		0
NSAIDs	ca_channel_blocker, antiepileptics	chinese_acupuncture, chinese_headache, chinese_herbal	2	1.1875e-05		0		0		0		0		0		0		0		0		0
NSAIDs	ca_channel_blocker, antiepileptics, others_preventive	None	2	1.1875e-05		0		0		0		0		0		0		0		0		0
NSAIDs	ca_channel_blocker, antiepileptics, others_preventive	chinese_headache	1	5.9375e-06		0		0		0		0		0		0		0		0		0
NSAIDs	ca_channel_blocker, antiepileptics, antidepressants	chinese_headache, chinese_herbal	1	5.9375e-06		0		0		0		0		0		0		0		0		0
NSAIDs	ca_channel_blocker, beta_blocker	None	40	0.0002375	15	0.000375855	4	0.000238067	2	0.000212925	1	0.00016714	1	0.00023855		0		0		0		0
NSAIDs	ca_channel_blocker, beta_blocker	chinese_herbal	11	6.53125e-05	5	0.000125285	1	5.95167e-05	3	0.000319387	2	0.00033428	1	0.00023855		0		0		0		0
NSAIDs	ca_channel_blocker, beta_blocker	chinese_headache	1	5.9375e-06		0		0		0		0		0		0		0		0		0
NSAIDs	ca_channel_blocker, beta_blocker	chinese_headache, chinese_herbal	2	1.1875e-05		0		0		0		0		0		0		0		0		0
NSAIDs	ca_channel_blocker, beta_blocker, others_preventive	None	1	5.9375e-06		0		0		0		0		0		0		0		0		0
NSAIDs	ca_channel_blocker, beta_blocker, antidepressants	chinese_headache	1	5.9375e-06		0		0		0		0		0		0		0		0		0
NSAIDs	ca_channel_blocker, beta_blocker, antiepileptics	chinese_herbal	1	5.9375e-06		0		0		0		0		0		0		0		0		0
NSAIDs	ca_channel_blocker, beta_blocker, antiepileptics, antidepressants	None	1	5.9375e-06		0		0		0		0		0		0		0		0		0
NSAIDs, others_treatment	None	None	147	0.000872813	34	0.000851938	10	0.000595167	4	0.000425849	7	0.00116998		0	1	0.00032175	3	0.0012474	2	0.00105042		0
NSAIDs, others_treatment	None	chinese_herbal	25	0.000148438	6	0.000150342	5	0.000297584	1	0.000106462		0		0		0		0		0		0
NSAIDs, others_treatment	None	chinese_calmingmind		0	1	2.5057e-05		0		0		0		0		0		0		0		0
NSAIDs, others_treatment	None	chinese_headache	4	2.375e-05	1	2.5057e-05	1	5.95167e-05		0		0		0		0		0		0		0
NSAIDs, others_treatment	None	chinese_headache, chinese_herbal	10	5.9375e-05	1	2.5057e-05	1	5.95167e-05	1	0.000106462		0		0		0		0		0	1	0.000655738
NSAIDs, others_treatment	None	chinese_acupuncture	3	1.78125e-05		0		0		0		0		0		0		0		0		0
NSAIDs, others_treatment	None	chinese_acupuncture, chinese_headache, chinese_herbal	1	5.9375e-06		0		0		0		0		0		0		0		0		0
NSAIDs, others_treatment	others_preventive	None		0		0		0	2	0.000212925		0		0		0		0		0		0
NSAIDs, others_treatment	others_preventive	chinese_herbal	2	1.1875e-05		0		0		0		0		0		0		0		0		0
NSAIDs, others_treatment	others_preventive	chinese_headache, chinese_herbal	1	5.9375e-06		0		0		0		0		0		0		0		0		0
NSAIDs, others_treatment	antiepileptics	None	4	2.375e-05	2	5.0114e-05		0		0		0		0		0		0		0		0
NSAIDs, others_treatment	antiepileptics	chinese_herbal	2	1.1875e-05		0		0		0		0		0		0		0		0		0
NSAIDs, others_treatment	antiepileptics	chinese_headache, chinese_herbal	1	5.9375e-06		0		0		0		0		0		0		0		0		0
NSAIDs, others_treatment	antiepileptics	chinese_acupuncture	1	5.9375e-06		0		0		0		0		0		0		0		0		0
NSAIDs, others_treatment	antiepileptics	chinese_acupuncture, chinese_headache, chinese_herbal	1	5.9375e-06		0		0		0		0		0		0		0		0		0
NSAIDs, others_treatment	beta_blocker	None	3	1.78125e-05		0		0		0		0		0		0		0		0		0
NSAIDs, others_treatment	beta_blocker	chinese_headache, chinese_herbal	2	1.1875e-05		0		0		0		0		0		0		0		0		0
NSAIDs, others_treatment	beta_blocker	chinese_acupuncture, chinese_headache, chinese_herbal	1	5.9375e-06		0		0		0		0		0		0		0		0		0
NSAIDs, others_treatment	beta_blocker, others_preventive	chinese_headache		0	1	2.5057e-05		0		0		0		0		0		0		0		0
NSAIDs, others_treatment	ca_channel_blocker	None	15	8.90625e-05	2	5.0114e-05	1	5.95167e-05		0		0		0		0		0		0		0
NSAIDs, others_treatment	ca_channel_blocker	chinese_herbal	6	3.5625e-05	1	2.5057e-05	1	5.95167e-05		0		0		0		0		0		0		0
NSAIDs, others_treatment	ca_channel_blocker	chinese_headache	4	2.375e-05		0		0		0		0		0		0		0		0		0
NSAIDs, others_treatment	ca_channel_blocker	chinese_headache, chinese_herbal	1	5.9375e-06		0		0		0		0		0		0		0		0		0
NSAIDs, others_treatment	ca_channel_blocker	chinese_acupuncture, chinese_herbal	1	5.9375e-06		0		0		0		0		0		0		0		0		0
NSAIDs, others_treatment	ca_channel_blocker, others_preventive	chinese_acupuncture, chinese_headache, chinese_herbal	1	5.9375e-06		0		0		0		0		0		0		0		0		0
NSAIDs, others_treatment	ca_channel_blocker, antidepressants, others_preventive	chinese_headache, chinese_herbal	1	5.9375e-06		0		0		0		0		0		0		0		0		0
NSAIDs, others_treatment	ca_channel_blocker, antiepileptics	chinese_headache, chinese_herbal	1	5.9375e-06		0		0		0		0		0		0		0		0		0
NSAIDs, others_treatment	ca_channel_blocker, antiepileptics	chinese_acupuncture, chinese_headache, chinese_herbal	2	1.1875e-05		0		0		0		0		0		0		0		0		0
NSAIDs, others_treatment	ca_channel_blocker, beta_blocker, antiepileptics, others_preventive	chinese_acupuncture, chinese_headache, chinese_herbal		0	1	2.5057e-05		0		0		0		0		0		0		0		0
NSAIDs, antiemetics	None	None	174	0.00103313	30	0.00075171	14	0.000833234	5	0.000532311	6	0.00100284	1	0.00023855	2	0.000643501	1	0.0004158	2	0.00105042	1	0.000655738
NSAIDs, antiemetics	None	chinese_herbal	9	5.34375e-05	4	0.000100228	2	0.000119033		0	1	0.00016714		0		0	1	0.0004158		0		0
NSAIDs, antiemetics	None	chinese_headache	3	1.78125e-05		0		0		0		0		0		0		0		0		0
NSAIDs, antiemetics	None	chinese_headache, chinese_herbal	6	3.5625e-05		0	1	5.95167e-05		0		0		0		0		0		0		0
NSAIDs, antiemetics	None	chinese_acupuncture, chinese_herbal	1	5.9375e-06		0		0		0		0		0		0		0		0		0
NSAIDs, antiemetics	others_preventive	None	5	2.96875e-05		0		0		0		0		0		0		0		0		0
NSAIDs, antiemetics	others_preventive	chinese_herbal	2	1.1875e-05		0		0		0		0		0		0		0		0		0
NSAIDs, antiemetics	others_preventive	chinese_acupuncture, chinese_herbal		0		0		0		0	1	0.00016714		0		0		0		0		0
NSAIDs, antiemetics	antiepileptics, antidepressants	chinese_headache, chinese_herbal	1	5.9375e-06		0		0		0		0		0		0		0		0		0
NSAIDs, antiemetics	beta_blocker	None	2	1.1875e-05	1	2.5057e-05		0		0		0		0		0		0		0		0
NSAIDs, antiemetics	beta_blocker	chinese_herbal		0	1	2.5057e-05		0		0		0		0		0		0		0		0
NSAIDs, antiemetics	ca_channel_blocker	None	17	0.000100938	5	0.000125285	1	5.95167e-05		0		0	1	0.00023855		0		0		0		0
NSAIDs, antiemetics	ca_channel_blocker	chinese_herbal	4	2.375e-05	1	2.5057e-05		0	1	0.000106462		0		0		0		0		0		0
NSAIDs, antiemetics	ca_channel_blocker	chinese_headache, chinese_herbal	2	1.1875e-05		0		0		0		0		0		0		0		0		0
NSAIDs, antiemetics	ca_channel_blocker, others_preventive	None	1	5.9375e-06		0		0		0		0		0		0		0		0		0
NSAIDs, antiemetics	ca_channel_blocker, others_preventive	chinese_acupuncture, chinese_herbal	1	5.9375e-06		0		0		0		0		0		0		0		0		0
NSAIDs, antiemetics	ca_channel_blocker, antiepileptics	chinese_herbal	1	5.9375e-06		0		0		0		0		0		0		0		0		0
NSAIDs, antiemetics	ca_channel_blocker, beta_blocker	None		0	1	2.5057e-05		0		0		0		0		0		0		0		0
NSAIDs, antiemetics	ca_channel_blocker, beta_blocker, others_preventive	chinese_headache, chinese_herbal	1	5.9375e-06		0		0		0		0		0		0		0		0		0
NSAIDs, antiemetics, others_treatment	None	None	1	5.9375e-06		0		0		0		0		0		0		0		0		0
NSAIDs, antiemetics, others_treatment	None	chinese_herbal	1	5.9375e-06		0		0		0		0		0		0		0		0		0
NSAIDs, antiemetics, others_treatment	others_preventive	None	1	5.9375e-06		0		0		0		0		0		0		0		0		0
NSAIDs, antiemetics, others_treatment	ca_channel_blocker	chinese_herbal		0		0	1	5.95167e-05		0		0		0		0		0		0		0
NSAIDs, antiemetics, others_treatment	ca_channel_blocker	chinese_headache, chinese_herbal	1	5.9375e-06		0		0		0		0		0		0		0		0		0
NSAIDs, antiemetics, others_treatment	ca_channel_blocker, others_preventive	None		0	1	2.5057e-05		0		0		0		0		0		0		0		0
NSAIDs, cgrp	None	None		0	1	2.5057e-05	1	5.95167e-05		0		0		0		0		0		0		0
NSAIDs, cgrp	None	chinese_headache		0		0		0		0		0	1	0.00023855		0		0		0		0
NSAIDs, cgrp	antiepileptics, antidepressants	chinese_herbal		0		0		0		0		0	1	0.00023855		0		0		0		0
NSAIDs, triptan	None	None	98	0.000581875	27	0.000676539	9	0.000535651	3	0.000319387	2	0.00033428	4	0.000954198	6	0.0019305	5	0.002079	3	0.00157563	3	0.00196721
NSAIDs, triptan	None	chinese_herbal	7	4.15625e-05		0	2	0.000119033		0		0		0		0		0		0		0
NSAIDs, triptan	None	chinese_headache	5	2.96875e-05	1	2.5057e-05	1	5.95167e-05		0	1	0.00016714	1	0.00023855	1	0.00032175		0		0		0
NSAIDs, triptan	None	chinese_headache, chinese_herbal	4	2.375e-05		0		0		0		0		0		0		0		0		0
NSAIDs, triptan	antiepileptics	None	4	2.375e-05	1	2.5057e-05	1	5.95167e-05		0		0	1	0.00023855	1	0.00032175		0		0		0
NSAIDs, triptan	ca_channel_blocker	None	42	0.000249375	11	0.000275627	2	0.000119033	4	0.000425849	2	0.00033428	2	0.000477099	1	0.00032175	1	0.0004158		0		0
NSAIDs, triptan	ca_channel_blocker	chinese_herbal	1	5.9375e-06	1	2.5057e-05	1	5.95167e-05		0		0		0		0		0		0		0
NSAIDs, triptan	ca_channel_blocker	chinese_headache	1	5.9375e-06		0	2	0.000119033		0		0		0		0		0		0		0
NSAIDs, triptan	ca_channel_blocker	chinese_headache, chinese_herbal	3	1.78125e-05	1	2.5057e-05		0		0		0		0		0		0		0		0
NSAIDs, triptan	ca_channel_blocker, antiepileptics	None		0		0		0		0		0	1	0.00023855		0		0		0		0
NSAIDs, triptan, others_treatment	None	None	1	5.9375e-06		0		0		0		0	1	0.00023855		0		0		0		0
NSAIDs, triptan, antiemetics	None	None	1	5.9375e-06		0		0		0		0		0		0		0		0		0
NSAIDs, opioids	None	None	19	0.000112813	6	0.000150342		0	4	0.000425849	1	0.00016714		0		0		0		0		0
NSAIDs, opioids	None	chinese_herbal	1	5.9375e-06		0		0		0		0		0	1	0.00032175		0		0		0
NSAIDs, opioids	antiepileptics	None	1	5.9375e-06		0	1	5.95167e-05		0		0		0		0		0		0		0
NSAIDs, opioids	antiepileptics	chinese_herbal	1	5.9375e-06		0		0		0		0		0		0		0		0		0
NSAIDs, opioids	beta_blocker	None	2	1.1875e-05		0		0		0		0		0		0		0		0		0
NSAIDs, opioids	ca_channel_blocker	None	1	5.9375e-06	1	2.5057e-05		0		0		0		0		0		0		0		0
NSAIDs, opioids	ca_channel_blocker	chinese_acupuncture, chinese_headache, chinese_herbal	2	1.1875e-05		0		0		0		0		0		0		0		0		0
NSAIDs, opioids, others_treatment	ca_channel_blocker	chinese_headache, chinese_herbal	1	5.9375e-06		0		0		0		0		0		0		0		0		0
NSAIDs, opioids, others_treatment	ca_channel_blocker, beta_blocker	chinese_acupuncture, chinese_headache, chinese_herbal	1	5.9375e-06		0		0		0		0		0		0		0		0		0
NSAIDs, opioids, antiemetics	None	None	5	2.96875e-05	1	2.5057e-05		0		0		0		0		0		0		0		0
NSAIDs, opioids, antiemetics	others_preventive	None	1	5.9375e-06		0		0		0		0		0		0		0		0		0
NSAIDs, opioids, antiemetics	others_preventive	chinese_herbal	1	5.9375e-06		0		0		0		0		0		0		0		0		0
NSAIDs, opioids, antiemetics	ca_channel_blocker	None	1	5.9375e-06		0		0		0		0		0		0		0		0		0
NSAIDs, opioids, antiemetics, others_treatment	None	None	1	5.9375e-06		0		0		0		0		0		0		0		0		0
NSAIDs, opioids, antiemetics, others_treatment	ca_channel_blocker	None	1	5.9375e-06		0		0		0		0		0		0		0		0		0
NSAIDs, opioids, triptan	ca_channel_blocker	None	1	5.9375e-06		0		0		0		0		0		0		0		0		0
NSAIDs, ergotamine	None	None	130	0.000771875	35	0.000876995	11	0.000654684	7	0.000745236	4	0.000668561	4	0.000954198	1	0.00032175		0	1	0.00052521	1	0.000655738
NSAIDs, ergotamine	None	chinese_herbal	9	5.34375e-05	4	0.000100228	1	5.95167e-05	2	0.000212925		0		0	1	0.00032175	1	0.0004158		0		0
NSAIDs, ergotamine	None	chinese_headache	14	8.3125e-05	2	5.0114e-05	1	5.95167e-05		0		0	1	0.00023855		0		0	1	0.00052521		0
NSAIDs, ergotamine	None	chinese_headache, chinese_herbal	2	1.1875e-05		0		0		0		0		0		0		0		0		0
NSAIDs, ergotamine	others_preventive	chinese_headache, chinese_herbal	1	5.9375e-06		0		0		0		0		0		0		0		0		0
NSAIDs, ergotamine	antidepressants	None	2	1.1875e-05		0		0		0		0		0		0		0		0		0
NSAIDs, ergotamine	antiepileptics	None	2	1.1875e-05	2	5.0114e-05		0	1	0.000106462		0		0		0		0		0		0
NSAIDs, ergotamine	antiepileptics	chinese_herbal	1	5.9375e-06		0		0		0		0		0		0		0		0		0
NSAIDs, ergotamine	antiepileptics	chinese_headache, chinese_herbal	1	5.9375e-06		0		0		0		0		0		0		0		0		0
NSAIDs, ergotamine	antiepileptics, others_preventive	chinese_headache, chinese_herbal	1	5.9375e-06		0		0		0		0		0		0		0		0		0
NSAIDs, ergotamine	beta_blocker	None	1	5.9375e-06		0		0	1	0.000106462		0		0		0		0		0		0
NSAIDs, ergotamine	beta_blocker	chinese_herbal		0	1	2.5057e-05		0		0		0		0		0		0		0		0
NSAIDs, ergotamine	beta_blocker, others_preventive	None	1	5.9375e-06		0		0		0		0		0		0		0		0		0
NSAIDs, ergotamine	ca_channel_blocker	None	46	0.000273125	15	0.000375855	2	0.000119033	3	0.000319387	2	0.00033428	1	0.00023855		0		0		0		0
NSAIDs, ergotamine	ca_channel_blocker	chinese_herbal	1	5.9375e-06		0		0		0		0		0		0		0		0		0
NSAIDs, ergotamine	ca_channel_blocker	chinese_headache		0	1	2.5057e-05	1	5.95167e-05		0		0		0		0		0		0		0
NSAIDs, ergotamine	ca_channel_blocker	chinese_headache, chinese_herbal	1	5.9375e-06		0		0		0		0		0		0		0		0		0
NSAIDs, ergotamine	ca_channel_blocker, antidepressants	None	1	5.9375e-06		0		0		0		0		0		0		0		0		0
NSAIDs, ergotamine	ca_channel_blocker, antiepileptics	None	1	5.9375e-06		0		0		0		0		0		0		0		0		0
NSAIDs, ergotamine	ca_channel_blocker, antiepileptics	chinese_acupuncture, chinese_herbal	1	5.9375e-06		0		0		0		0		0		0		0		0		0
NSAIDs, ergotamine	ca_channel_blocker, beta_blocker	chinese_herbal	1	5.9375e-06		0		0		0		0		0		0		0		0		0
NSAIDs, ergotamine	ca_channel_blocker, beta_blocker, antiepileptics	chinese_herbal	1	5.9375e-06		0		0		0		0		0		0		0		0		0
NSAIDs, ergotamine, others_treatment	None	None	1	5.9375e-06		0		0		0		0		0		0		0		0		0
NSAIDs, ergotamine, triptan	None	None	1	5.9375e-06		0	1	5.95167e-05		0		0		0		0		0		0		0
			168421	1	39909	1	16802	1	9393	1	5983	1	4192	1	3108	1	2405	1	1904	1	1525	1
