# Supplementary material for: Treatment Patterns and healthcare costs of Migraine Patients in China: Insights from a Retrospective Database Study
Source: Research Square preprint supplement (doi:10.21203/rs.3.rs-7149897/v1), 2025-08-06
Supplement: Supplementary file 2 [file ea736a313d661a3fdb8da8f5.xlsx]

## Sheet: Sheet1
Treatment pattern	Total		2018		2019		2020		2021		2022		2023		2024			2018-2024
	N=168,421		N=16,510		N=28,506		N=33,135		N=38,628		N=33,998		N=28,365		N=14,865			2018
			(New user: N=16,510)a		(New user: N=26,284)a		(New user: N=29,608)a		(New user: N=33,420)a		(New user: N=28,660)a		(New user: N=24,239)a		(New user: N=9,700)a			2019
	n	%	n	%	n	%	n	%	n	%	n	%	n	%	n	%		2020
Acute treatment	63685	0.37813	5852	0.354452	10490	0.367993	13482	0.406881	13890	0.359584	12723	0.374228	9051	0.31909	4247	0.285705		2021
Acetaminophen and NSAIDs	58027	0.344535	5304	0.32126	9450	0.331509	12431	0.375162	12608	0.326395	11798	0.34702	7986	0.281544	3410	0.229398		2022
Ibuprofen	20613	0.12239	1377	0.083404	2656	0.0931734	3018	0.0910819	3449	0.0892876	4483	0.131861	4641	0.163617	1926	0.129566		2023
Acetaminophen	18001	0.106881	2551	0.154512	4482	0.15723	5062	0.152769	4077	0.105545	1209	0.0355609	1516	0.0534461	518	0.034847		2024
Phenaminopyrine	12783	0.0758991	719	0.0435494	1284	0.0450431	3281	0.0990192	3627	0.0938956	4423	0.130096	324	0.0114225	150	0.0100908
Diclofenac	4834	0.0287019	330	0.0199879	584	0.0204869	654	0.0197374	953	0.0246712	1115	0.032796	934	0.0329279	446	0.0300034
Aspirin	3613	0.0214522	436	0.0264082	622	0.02182	664	0.0200392	671	0.0173708	672	0.0197659	498	0.0175568	286	0.0192398
Loxoprofen	3517	0.0208822	235	0.0142338	511	0.0179261	619	0.0186812	566	0.0146526	727	0.0213836	678	0.0239027	291	0.0195762
Celecoxib	915	0.00543281	34	0.00205936	111	0.00389392	147	0.0044364	210	0.00543647	171	0.00502971	172	0.00606381	83	0.00558359
Meloxicam	405	0.00240469	56	0.00339188	70	0.00245562	71	0.00214275	84	0.00217459	85	0.00250015	36	0.00126917	12	0.000807265
Indomethacin farnesil	125	0.000742188	18	0.00109025	14	0.000491125	18	0.000543232	23	0.000595423	30	0.000882405	12	0.000423057	11	0.000739993
Naproxen	124	0.00073625	0	0	0	0	0	0	0	0	4	0.000117654	50	0.00176274	71	0.00477632
Etoricoxib	51	0.000302813	0	0	1	3.50803e-05	4	0.000120718	7	0.000181216	9	0.000264721	22	0.000775604	9	0.000605449
Ketorolac Tromethamine	24	0.0001425	0	0	1	3.50803e-05	1	3.01796e-05	2	5.17759e-05	4	0.000117654	11	0.000387802	6	0.000403633
Piroxicam	6	3.5625e-05	0	0	0	0	0	0	0	0	0	0	1	3.52547e-05	5	0.000336361
Triptan	2887	0.0171416	301	0.0182314	527	0.0184873	461	0.0139128	550	0.0142384	477	0.0140302	517	0.0182267	535	0.0359906
Rizatriptan	2415	0.0143391	260	0.015748	452	0.0158563	301	0.00908405	433	0.0112095	429	0.0126184	440	0.0155121	450	0.0302725
Zolmitriptan	489	0.00290344	41	0.00248334	76	0.00266611	163	0.00491927	117	0.00302889	48	0.00141185	80	0.00282038	87	0.00585267
Weak opioids/opioids	889	0.00527844	68	0.00411872	125	0.00438504	168	0.00507017	151	0.00390908	132	0.00388258	233	0.00821435	90	0.00605449
Codeine	565	0.00335469	18	0.00109025	44	0.00154353	58	0.00175041	85	0.00220048	93	0.00273546	208	0.00733298	69	0.00464178
Tramadol	172	0.00102125	30	0.00181708	51	0.0017891	37	0.00111664	28	0.000724863	16	0.000470616	16	0.000564075	15	0.00100908
Oxycodone	159	0.000944063	22	0.00133253	30	0.00105241	73	0.00220311	38	0.000983742	25	0.000735337	10	0.000352547	7	0.000470905
Ergot derivatives	2171	0.0128903	171	0.0103574	325	0.0114011	403	0.0121624	595	0.0154033	319	0.0093829	277	0.00976556	252	0.0169526
Nicergoline	1831	0.0108716	142	0.00860085	287	0.0100681	352	0.0106232	523	0.0135394	300	0.00882405	212	0.007474	173	0.0116381
Dihydroergotoxine	349	0.00207219	29	0.00175651	38	0.00133305	51	0.00153916	76	0.00196748	20	0.00058827	65	0.00229156	81	0.00544904
Antiemetics	632	0.0037525	62	0.0037553	107	0.0037536	125	0.00377245	124	0.00321011	121	0.00355903	80	0.00282038	38	0.00255634
Metoclopramide	222	0.00131813	19	0.00115082	32	0.00112257	33	0.000995926	57	0.00147561	38	0.00111771	41	0.00144544	14	0.00094181
Domperidone	411	0.00244031	43	0.00260448	75	0.00263103	92	0.00277652	68	0.00176038	83	0.00244132	39	0.00137493	24	0.00161453
Others	1114	0.00661438	116	0.00702604	170	0.00596366	161	0.00485891	165	0.00427151	123	0.00361786	134	0.00472413	82	0.00551631
Glucocorticoids	791	0.00469656	72	0.00436099	127	0.0044552	130	0.00392334	157	0.00406441	115	0.00338255	144	0.00507668	71	0.00477632
Mannitol injection	391	0.00232156	69	0.00417929	94	0.00329755	78	0.00235401	68	0.00176038	51	0.00150009	38	0.00133968	29	0.00195089
Anti-CGRP mAbs	37	0.000219688	0	0	0	0	0	0	0	0	0	0	0	0	37	0.00248907
‌Rimegepant	37	0.000219688	0	0	0	0	0	0	0	0	0	0	0	0	37	0.00248907
Preventive treatment	48543	0.288224	4846	0.293519	8309	0.291482	9403	0.283778	11489	0.297427	9317	0.274046	7379	0.260145	4207	0.283014
Antiepileptics	4215	0.0250266	295	0.017868	541	0.0189785	750	0.0226347	1013	0.0262245	823	0.0242073	780	0.0274987	536	0.0360579
Magnesium valproate	3	1.78125e-05	1	6.05694e-05	0	0	0	0	0	0	1	2.94135e-05	0	0	1	6.72721e-05
Sodium valproate	856	0.0050825	73	0.00442156	102	0.00357819	164	0.00494945	227	0.00587657	164	0.00482381	131	0.00461837	103	0.00692903
Topiramate	1689	0.0100284	102	0.00617807	222	0.00778783	299	0.00902369	358	0.00926789	321	0.00944173	351	0.0123744	304	0.0204507
Gabapentin	686	0.00407313	71	0.00430042	118	0.00413948	114	0.00344047	164	0.00424562	108	0.00317666	98	0.00345496	46	0.00309452
Pregabalin	753	0.00447094	5	0.000302847	30	0.00105241	119	0.00359137	216	0.0055918	168	0.00494147	153	0.00539397	86	0.0057854
Carbamazepine	435	0.00258281	56	0.00339188	84	0.00294675	84	0.00253508	79	0.00204515	77	0.00226484	63	0.00222105	25	0.0016818
Oxcarbazepine	53	0.000314688	3	0.000181708	4	0.000140321	5	0.000150898	13	0.000336543	17	0.000500029	12	0.000423057	7	0.000470905
Antidepressants	624	0.003705	89	0.00539067	104	0.00364835	100	0.00301796	146	0.00377964	79	0.00232367	82	0.00289089	89	0.00598722
Venlafaxine	449	0.00266594	54	0.00327075	67	0.00235038	60	0.00181077	91	0.0023558	67	0.0019707	79	0.00278512	85	0.00571813
Amitriptyline	178	0.00105688	36	0.0021805	37	0.00129797	40	0.00120718	56	0.00144973	12	0.000352962	3	0.000105764	5	0.000336361
Beta-blockers	2283	0.0135553	194	0.0117505	322	0.0112959	401	0.012102	475	0.0122968	431	0.0126772	350	0.0123392	240	0.0161453
Atenolol	8	4.75e-05	0	0	0	0	0	0	0	0	0	0	2	7.05094e-05	6	0.000403633
Metoprolol	1542	0.00915563	144	0.00872199	228	0.00799832	306	0.00923495	316	0.00818059	284	0.00835343	206	0.00726247	133	0.00894719
Bisoprolol	555	0.00329531	42	0.00254391	77	0.00270119	83	0.0025049	112	0.00289945	100	0.00294135	104	0.00366649	72	0.00484359
Propranolol	185	0.00109844	10	0.000605694	17	0.000596366	12	0.000362155	49	0.00126851	47	0.00138243	39	0.00137493	29	0.00195089
Ca-channel blockers	42243	0.250818	4327	0.262084	7412	0.260015	8230	0.248378	9968	0.258051	8029	0.236161	6212	0.219002	3416	0.229802
Flunarizine	42209	0.250616	4325	0.261962	7409	0.25991	8225	0.248227	9950	0.257585	8022	0.235955	6209	0.218897	3416	0.229802
Verapamil	39	0.000231563	2	0.000121139	4	0.000140321	5	0.000150898	20	0.000517759	8	0.000235308	3	0.000105764	0	0
Others	2489	0.0147784	167	0.0101151	310	0.0108749	462	0.013943	542	0.0140313	464	0.0136479	388	0.0136788	254	0.0170871
Type A botulinum toxin	33	0.000195938	3	0.000181708	3	0.000105241	6	0.000181077	12	0.000310655	6	0.000176481	7	0.000246783	9	0.000605449
Vitamin B2	1131	0.00671531	69	0.00417929	154	0.00540237	235	0.0070922	236	0.00610956	183	0.00538267	179	0.00631059	98	0.00659267
Coenzyme Q10	332	0.00197125	18	0.00109025	32	0.00112257	52	0.00156934	123	0.00318422	104	0.003059	18	0.000634585	5	0.000336361
Lisinopril	14	8.3125e-05	1	6.05694e-05	2	7.01607e-05	3	9.05387e-05	3	7.76639e-05	2	5.8827e-05	4	0.000141019	0	0
Candesartan cilexetil	375	0.00222656	41	0.00248334	67	0.00235038	65	0.00196167	69	0.00178627	67	0.0019707	46	0.00162172	39	0.00262361
Vitamin B6	658	0.00390688	36	0.0021805	56	0.0019645	114	0.00344047	109	0.00282179	109	0.00320607	144	0.00507668	108	0.00726539
Traditional Chinese medicine	50134	0.297671	4386	0.265657	7640	0.268014	8813	0.265973	10735	0.277907	9341	0.274751	8974	0.316376	5307	0.357013
Chinese herbal medicine	30962	0.183837	3023	0.183101	4784	0.167824	5259	0.158714	6461	0.167262	5778	0.169951	5191	0.183007	2891	0.194484
Headache-Relieving Chinese Patent Medicines	23366	0.138736	1676	0.101514	3279	0.115028	4107	0.123947	4976	0.128818	4382	0.12889	4233	0.149233	2619	0.176186
Sedative Chinese Patent Medicines	717	0.00425719	91	0.00551181	116	0.00406932	123	0.00371209	169	0.00437506	98	0.00288252	110	0.00387802	54	0.00363269
Acupuncture therapy	5616	0.033345	466	0.0282253	828	0.0290465	844	0.0254716	1123	0.0290722	868	0.0255309	1248	0.0439979	859	0.0577867
Acute treatment only	41551	0.246709	3994	0.241914	7241	0.254017	9591	0.289452	9454	0.244745	8959	0.263516	6114	0.215547	2559	0.172149
Preventive treatment only	25409	0.150866	2897	0.175469	4948	0.173577	5421	0.163603	6452	0.167029	5229	0.153803	4239	0.149445	2356	0.158493
Traditional Chinese Medicine only	26384	0.156655	2581	0.156329	4408	0.154634	4746	0.143232	5806	0.150305	5079	0.149391	5587	0.196968	3384	0.227649
Acute and preventive treatments	8790	0.0521906	166	0.0100545	175	0.00613906	169	0.00510035	132	0.00341721	65	0.00191188	52	0.00183325	12	0.000807265
TCM and preventive treatment	10406	0.0617856	196	0.0118716	173	0.0060689	188	0.00567376	178	0.00460806	110	0.00323548	108	0.00380751	27	0.00181635
TCM and acute treatment	9406	0.0558481	252	0.0152635	251	0.00880516	241	0.00727328	222	0.00574713	108	0.00317666	84	0.0029614	17	0.00114363
Acute treatment and preventive treatments and TCM	3938	0.0233819	54	0.00327075	56	0.0019645	58	0.00175041	62	0.00160505	28	0.000823578	25	0.000881368	9	0.000605449
单一治疗模式		0.55423		0.573713		0.582228		0.596288		0.562079		0.56671		0.56196		0.558291
多种治疗模式联合		0.193206		0.0404603		0.0229776		0.0197978		0.0153774		0.0091476		0.00948352		0.00437269
采取任何治疗比例		0.747436		0.614173		0.605206		0.616086		0.577457		0.575857		0.571444		0.562664
